# Supplementary material for: Sterol regulatory element binding protein-dependent regulation of lipid synthesis supports cell survival and tumor growth
Source: PubMed Central journal article supplement (PMC3835903; doi:10.1186/2049-3002-1-3), 2013-01-23
Supplement: 2049-3002-1-3-S2.pdf [file 2049-3002-1-3-S2.pdf]

Table S1. List of 416 genes regulated by SREBP1 and SREBP2 in a cooperative manner

Table with columns: symbol, Entrez Acc number, Signal Intensity (siCRE, siCR4-OHT, siSREBP1, siSREBP2, siSREBP1+2, siSREBP2+2, siSREBP1+2+4, siSREBP2+2+4), Fold change over si-control and p-value (siSREBP1, siSREBP2, siSREBP1+2, siSREBP2+2, siSREBP1+2+4, siSREBP2+2+4), and gene name. The table lists 416 genes and their corresponding p-values and fold changes across various siRNA treatments.

Table with columns for gene names (e.g., ILMN\_1686152, GGA2, 230622), numerical identifiers (e.g., 463, 451, 424), and gene annotations (e.g., goli-associated, gamma adaptin ear containing, ARF binding protein 2). The table is organized into columns representing different data fields for each gene entry.
