# Supplementary material for: Sterol regulatory element binding protein-dependent regulation of lipid synthesis supports cell survival and tumor growth
Source: PubMed Central journal article supplement (PMC3835903; doi:10.1186/2049-3002-1-3), 2013-01-23
Supplement: 2049-3002-1-3-S6.pdf [file 2049-3002-1-3-S6.pdf]

Table S2: Lipid concentrations in RPE-myrAkt-ER cells after depletion of SREBP

| lipid species            | concentration [ng/μg protein] |                 |                  |                 |                 |                 |                 |                 |                 |                 |                 |                 |                  |                  |                  |                  |
|--------------------------|-------------------------------|-----------------|------------------|-----------------|-----------------|-----------------|-----------------|-----------------|-----------------|-----------------|-----------------|-----------------|------------------|------------------|------------------|------------------|
|                          | siControl ethanol             |                 | siControl 4-OHT  |                 | siBP1 ethanol   |                 | siBP1 4-OHT     |                 | siBP2 ethanol   |                 | siBP2 4-OHT     |                 | siBP1+2 ethanol  |                  | siBP1+2 4-OHT    |                  |
| free fatty acid          | 6568.03                       | 4006.54         | 6746.66          | 4523.21         | 4662.29         | 2305.41         | 3006.82         | 2695.09         | 2874.88         | 2275.89         | 2308.89         | 1718.84         | 2386.6268        | 2010.0922        | 1812.4859        | 1694.9776        |
| monoacylglycerol         | 193.85                        | 167.27          | 205.31           | 232.02          | 274.20          | 164.48          | 293.76          | 212.65          | 55.06           | 87.87           | 82.46           | 88.26           | 99.594076        | 106.63392        | 71.822883        | 90.289657        |
| diacylglycerol           | 571.35                        | 506.43          | 1302.84          | 1000.64         | 445.03          | 333.88          | 524.36          | 522.87          | 290.40          | 343.27          | 507.13          | 364.79          | 336.78577        | 334.34706        | 436.92953        | 407.23694        |
| triacylglycerol          | 243.05                        | 239.63          | 483.70           | 360.59          | 509.83          | 279.46          | 446.95          | 424.46          | 242.52          | 225.01          | 285.73          | 265.84          | 178.60037        | 181.47083        | 212.87762        | 196.07989        |
| cholesterol ester        | 855.27                        | 569.00          | 970.47           | 680.43          | 760.96          | 433.42          | 771.94          | 626.53          | 541.19          | 501.96          | 620.56          | 534.80          | 442.88071        | 319.41683        | 449.75205        | 443.22113        |
| cholesterol              | 29584.59                      | 20783.97        | 24026.84         | 18114.93        | 26266.81        | 21594.37        | 16815.79        | 15704.74        | 16624.64        | 18018.18        | 15471.10        | 15883.00        | 10450.134        | 9460.9724        | 9170.5695        | 8858.1005        |
| phosphatidic acid        | 179.66                        | 105.71          | 248.95           | 177.86          | 223.37          | 197.04          | 276.91          | 493.98          | 356.70          | 348.53          | 301.22          | 364.20          | 648.50719        | 752.15065        | 814.13215        | 735.31712        |
| phosphatidylglycerol     | 873.27                        | 634.95          | 910.68           | 412.88          | 458.85          | 348.84          | 395.42          | 388.27          | 276.14          | 373.77          | 453.88          | 428.17          | 375.18371        | 347.98277        | 376.56588        | 314.93667        |
| cardiolipin              | 6187.19                       | 4635.35         | 6677.48          | 4723.24         | 3838.33         | 3341.03         | 5207.79         | 3531.35         | 3800.77         | 4726.98         | 5002.52         | 5852.68         | 5551.5666        | 5055.313         | 4760.4459        | 5006.4511        |
| phosphatidylcholine      | 7208.45                       | 4574.36         | 10910.07         | 5987.31         | 6481.41         | 3285.85         | 7713.37         | 6189.34         | 5575.77         | 6273.12         | 7901.92         | 5353.55         | 4742.2376        | 6944.9916        | 6375.1895        | 5495.8499        |
| phosphatidylethanolamine | 9620.47                       | 4693.50         | 9543.06          | 5209.75         | 5615.51         | 4930.90         | 5239.92         | 3855.24         | 3923.26         | 4837.97         | 4649.72         | 5473.94         | 5640.6586        | 4565.9241        | 4762.0111        | 4582.0495        |
| phosphatidylinositol     | 20363.66                      | 14609.31        | 23586.253        | 19419.784       | 16890.514       | 14153.306       | 19207.539       | 19705.052       | 12252.371       | 13787.842       | 15889.845       | 15875.753       | 11632.56         | 10590.985        | 11586.317        | 11066.676        |
| phosphatidylserine       | 7242.91                       | 5902.82         | 9617.71          | 6182.72         | 3681.79         | 4177.04         | 4030.56         | 3149.76         | 2735.73         | 3249.21         | 3744.92         | 3373.37         | 3245.5793        | 3096.3237        | 3337.3884        | 3467.0058        |
| lysophosphatidylcholine  | 305.46                        | 226.84          | 202.85           | 215.18          | 392.86          | 263.36          | 245.57          | 221.61          | 179.76          | 237.48          | 116.27          | 118.02          | 196.96799        | 175.72466        | 162.88775        | 154.30365        |
| sphingosine              | 4.47                          | 2.78            | 4.06             | 2.75            | 1.63            | 1.39            | 1.57            | 1.82            | 3.94            | 4.08            | 2.90            | 3.10            | 1.1684402        | 1.0116043        | 1.9613448        | 2.0205162        |
| ceramide                 | 316.26                        | 226.59          | 318.26           | 235.94          | 246.96          | 158.80          | 191.54          | 178.92          | 193.95          | 194.54          | 133.69          | 130.30          | 474.931          | 389.17584        | 128.74613        | 138.15863        |
| sphingomyelin            | 7221.00                       | 5589.39         | 9973.76          | 7433.29         | 6665.03         | 4450.49         | 6212.00         | 5818.92         | 4514.07         | 4855.71         | 5473.55         | 5539.62         | 4396.9653        | 4004.3542        | 4433.9032        | 4237.6034        |
| <b>total lipids</b>      | <b>97538.95</b>               | <b>67474.46</b> | <b>105728.94</b> | <b>74912.54</b> | <b>77415.39</b> | <b>60419.06</b> | <b>70581.81</b> | <b>63720.60</b> | <b>54441.14</b> | <b>60341.43</b> | <b>62946.31</b> | <b>61368.21</b> | <b>50800.948</b> | <b>48336.871</b> | <b>48893.985</b> | <b>46890.278</b> |
