# Supplementary material for: Sterol regulatory element binding protein-dependent regulation of lipid synthesis supports cell survival and tumor growth
Source: PubMed Central journal article supplement (PMC3835903; doi:10.1186/2049-3002-1-3), 2013-01-23
Supplement: 2049-3002-1-3-S7.pdf [file 2049-3002-1-3-S7.pdf]

Table S3: Lipid composition in RPE-myrAkt-ER cells after depletion of SREBP

| Lipid            | % of total    |             |               |             |               |             |                 |               |       |       |       |       |       |       |       |       |
|------------------|---------------|-------------|---------------|-------------|---------------|-------------|-----------------|---------------|-------|-------|-------|-------|-------|-------|-------|-------|
| Ceramide         | siCtr ethanol | siCtr 4-OHT | siBP1 ethanol | siBP1 4-OHT | siBP2 ethanol | siBP2 4-OHT | siBP1+2 ethanol | siBP1+2 4-OHT |       |       |       |       |       |       |       |       |
| 14:0-Cer         | 3.1           | 2.8         | 3.9           | 4.8         | 1.9           | 1.7         | 2.0             | 2.0           | 2.9   | 3.6   | 4.2   | 4.9   | 3.0   | 2.7   | 2.2   | 3.2   |
| 16:1-Cer         | 3.3           | 3.3         | 3.0           | 2.6         | 2.9           | 2.7         | 1.5             | 1.8           | 3.3   | 3.7   | 2.8   | 2.9   | 2.1   | 2.0   | 2.1   | 3.0   |
| 16:0-Cer         | 38.2          | 39.1        | 32.4          | 34.1        | 35.5          | 32.9        | 27.4            | 28.5          | 45.3  | 42.0  | 36.6  | 35.1  | 46.9  | 47.4  | 41.3  | 41.5  |
| 18:0-Cer         | 1.1           | 1.1         | 0.9           | 1.0         | 1.8           | 1.7         | 0.7             | 0.9           | 2.6   | 2.8   | 1.5   | 1.6   | 3.0   | 2.9   | 1.5   | 1.6   |
| 22:1-Cer         | 1.2           | 1.5         | 2.1           | 1.6         | 1.1           | 1.0         | 0.9             | 1.0           | 1.2   | 1.3   | 1.8   | 1.5   | 1.3   | 1.0   | 1.1   | 1.2   |
| 22:0-Cer         | 2.5           | 2.4         | 2.6           | 2.2         | 4.4           | 3.6         | 2.6             | 2.9           | 4.8   | 5.4   | 4.7   | 4.1   | 6.0   | 6.0   | 5.1   | 4.9   |
| 24:1-Cer         | 18.8          | 18.6        | 21.7          | 20.4        | 13.3          | 13.9        | 17.6            | 17.0          | 11.9  | 11.9  | 14.5  | 16.0  | 8.8   | 8.4   | 8.6   | 8.4   |
| 24:0-Cer         | 20.4          | 19.4        | 20.1          | 19.1        | 29.2          | 31.1        | 36.0            | 33.4          | 19.4  | 19.7  | 20.4  | 19.6  | 22.2  | 23.1  | 29.3  | 28.1  |
| 26:1-Cer         | 6.9           | 6.7         | 8.4           | 9.1         | 4.1           | 5.1         | 5.5             | 6.2           | 3.7   | 4.4   | 7.2   | 7.7   | 2.4   | 2.5   | 3.1   | 2.5   |
| 26:0-Cer         | 4.6           | 5.0         | 5.0           | 5.1         | 5.8           | 6.4         | 5.9             | 6.5           | 4.8   | 5.3   | 6.2   | 6.6   | 4.2   | 4.1   | 5.7   | 5.6   |
| Total            | 100.0         | 100.0       | 100.0         | 100.0       | 100.0         | 100.0       | 100.0           | 100.0         | 100.0 | 100.0 | 100.0 | 100.0 | 100.0 | 100.0 | 100.0 | 100.0 |
| Cardiolipin      | siCtr ethanol | siCtr 4-OHT | siBP1 ethanol | siBP1 4-OHT | siBP2 ethanol | siBP2 4-OHT | siBP1+2 ethanol | siBP1+2 4-OHT |       |       |       |       |       |       |       |       |
| 64:3-CL          | 0.1           | 0.4         | 0.3           | 0.1         | 0.0           | 0.1         | 0.3             | 0.1           | 0.2   | 0.2   | 0.1   | 0.1   | 0.1   | 0.1   | 0.1   | 0.1   |
| 64:2-CL          | 0.2           | 0.2         | 0.3           | 0.3         | 0.2           | 0.2         | 0.2             | 0.2           | 0.1   | 0.1   | 0.3   | 0.4   | 0.1   | 0.2   | 0.1   | 0.1   |
| 66:4-CL          | 1.5           | 1.2         | 2.6           | 3.2         | 0.5           | 0.6         | 0.7             | 1.3           | 0.6   | 0.8   | 1.0   | 1.3   | 0.4   | 0.5   | 0.5   | 0.5   |
| 66:3-CL          | 1.4           | 1.5         | 2.0           | 2.8         | 0.9           | 1.2         | 1.1             | 1.7           | 0.9   | 1.1   | 1.5   | 1.9   | 0.6   | 0.6   | 0.7   | 0.7   |
| 66:2-CL          | 1.0           | 1.2         | 0.8           | 1.0         | 0.8           | 0.8         | 0.7             | 0.9           | 1.0   | 1.0   | 1.3   | 1.3   | 0.3   | 0.6   | 0.5   | 0.4   |
| 68:6-CL          | 0.8           | 0.2         | 0.5           | 0.7         | 0.2           | 0.1         | 0.4             | 0.3           | 0.2   | 0.5   | 0.4   | 0.4   | 0.2   | 0.3   | 0.2   | 0.3   |
| 68:5-CL          | 3.0           | 3.3         | 3.9           | 4.9         | 1.4           | 2.0         | 2.8             | 2.4           | 2.1   | 2.1   | 2.3   | 2.8   | 1.3   | 1.5   | 1.6   | 1.8   |
| 68:4-CL          | 8.7           | 7.8         | 11.0          | 12.1        | 5.0           | 5.3         | 6.7             | 7.8           | 4.6   | 5.4   | 6.1   | 6.8   | 3.8   | 4.0   | 3.7   | 3.6   |
| 68:3-CL          | 6.2           | 6.9         | 6.5           | 7.3         | 3.6           | 5.0         | 4.7             | 5.2           | 3.7   | 3.8   | 4.6   | 5.0   | 2.6   | 2.9   | 2.9   | 3.4   |
| 68:2-CL          | 4.2           | 3.9         | 3.7           | 3.2         | 3.1           | 3.8         | 3.7             | 4.3           | 3.6   | 3.5   | 4.1   | 3.8   | 2.1   | 2.4   | 2.4   | 2.1   |
| 68:1-CL          | 0.8           | 0.9         | 0.5           | 0.5         | 0.7           | 1.3         | 0.9             | 0.7           | 1.0   | 0.8   | 0.9   | 1.0   | 0.5   | 0.5   | 0.7   | 0.6   |
| 70:7-CL          | 0.4           | 0.4         | 0.8           | 0.4         | 0.5           | 0.4         | 0.6             | 0.2           | 0.8   | 0.8   | 0.6   | 0.6   | 0.3   | 0.5   | 0.6   | 0.6   |
| 70:6-CL          | 2.4           | 3.9         | 2.4           | 3.2         | 3.7           | 2.0         | 3.0             | 2.7           | 3.0   | 2.9   | 3.3   | 2.9   | 2.8   | 2.8   | 2.8   | 2.8   |
| 70:5-CL          | 13.7          | 12.8        | 12.4          | 10.9        | 11.8          | 11.2        | 12.2            | 11.7          | 9.1   | 9.4   | 9.9   | 9.6   | 8.8   | 9.0   | 8.2   | 8.7   |
| 70:4-CL          | 14.8          | 14.2        | 15.1          | 13.7        | 13.0          | 12.9        | 12.3            | 12.6          | 11.4  | 10.9  | 10.6  | 10.5  | 9.5   | 9.6   | 9.4   | 10.3  |
| 70:3-CL          | 6.5           | 6.7         | 6.3           | 5.1         | 6.4           | 6.1         | 5.0             | 6.1           | 5.8   | 5.8   | 5.9   | 6.1   | 4.9   | 5.1   | 5.1   | 5.5   |
| 70:2-CL          | 1.0           | 1.2         | 0.9           | 0.6         | 0.9           | 1.8         | 1.2             | 1.3           | 1.8   | 1.8   | 1.6   | 1.9   | 1.5   | 1.6   | 2.3   | 1.8   |
| 72:8-CL          | 1.0           | 0.6         | 0.5           | 0.5         | 0.9           | 0.7         | 0.8             | 0.5           | 1.2   | 0.8   | 1.0   | 1.1   | 1.3   | 1.0   | 1.2   | 1.3   |
| 72:7-CL          | 1.1           | 1.5         | 1.9           | 1.6         | 2.6           | 2.9         | 2.2             | 2.7           | 3.1   | 3.0   | 2.9   | 2.6   | 3.8   | 3.9   | 3.7   | 4.0   |
| 72:6-CL          | 8.1           | 9.2         | 6.0           | 6.2         | 13.5          | 10.4        | 10.6            | 10.8          | 11.6  | 11.6  | 10.7  | 10.7  | 13.7  | 13.7  | 13.8  | 14.3  |
| 72:5-CL          | 12.5          | 10.4        | 10.5          | 9.2         | 15.5          | 14.5        | 14.7            | 13.1          | 15.0  | 15.3  | 14.2  | 13.1  | 16.9  | 17.0  | 16.8  | 15.8  |
| 72:4-CL          | 5.2           | 6.4         | 4.2           | 4.7         | 6.2           | 5.1         | 5.7             | 5.9           | 7.6   | 6.8   | 5.9   | 6.3   | 7.8   | 7.7   | 7.5   | 7.4   |
| 72:3-CL          | 1.3           | 1.7         | 1.3           | 0.9         | 1.4           | 1.2         | 1.7             | 1.5           | 2.5   | 2.9   | 2.1   | 2.2   | 2.6   | 2.9   | 3.0   | 2.7   |
| 74:8-CL          | 1.4           | 0.9         | 2.1           | 3.6         | 3.2           | 4.4         | 3.5             | 1.8           | 3.3   | 2.6   | 2.8   | 2.5   | 4.5   | 4.3   | 4.3   | 3.4   |
| 74:7-CL          | 1.1           | 1.4         | 1.5           | 1.3         | 3.0           | 2.9         | 2.4             | 2.3           | 3.1   | 2.5   | 2.9   | 2.4   | 5.1   | 3.8   | 4.1   | 3.9   |
| 74:6-CL          | 1.0           | 1.3         | 1.4           | 1.6         | 0.7           | 2.5         | 2.0             | 1.7           | 2.2   | 2.9   | 2.2   | 2.2   | 3.5   | 2.8   | 2.9   | 3.4   |
| 74:5-CL          | 0.3           | 0.2         | 0.3           | 0.2         | 0.2           | 0.7         | 0.1             | 0.3           | 0.5   | 0.8   | 0.5   | 0.6   | 0.8   | 0.7   | 0.8   | 0.7   |
| Total            | 100.0         | 100.0       | 100.0         | 100.0       | 100.0         | 100.0       | 100.0           | 100.0         | 100.0 | 100.0 | 100.0 | 100.0 | 100.0 | 100.0 | 100.0 | 100.0 |
| Diacylglycerol   | siCtr ethanol | siCtr 4-OHT | siBP1 ethanol | siBP1 4-OHT | siBP2 ethanol | siBP2 4-OHT | siBP1+2 ethanol | siBP1+2 4-OHT |       |       |       |       |       |       |       |       |
| 30:2-DG          | 0.3           | 0.3         | 0.7           | 1.0         | 0.1           | 0.1         | 0.3             | 0.3           | 0.1   | 0.1   | 0.4   | 0.6   | 0.1   | 0.0   | 0.1   | 0.1   |
| 30:1-DG          | 1.8           | 1.9         | 2.6           | 2.9         | 1.1           | 1.4         | 1.8             | 1.8           | 0.9   | 1.2   | 1.9   | 2.4   | 0.4   | 0.5   | 0.6   | 0.8   |
| 30:0-DG          | 2.7           | 2.4         | 2.2           | 2.3         | 3.2           | 3.2         | 2.6             | 2.6           | 2.9   | 3.0   | 3.0   | 3.2   | 3.1   | 3.1   | 2.8   | 3.4   |
| 32:3-DG          | 0.7           | 0.6         | 0.8           | 0.9         | 1.9           | 1.5         | 1.1             | 0.8           | 0.7   | 0.4   | 0.5   | 0.5   | 1.0   | 1.3   | 0.4   | 0.4   |
| 32:2-DG          | 4.4           | 4.2         | 6.5           | 7.3         | 1.8           | 2.1         | 3.3             | 3.5           | 1.6   | 1.8   | 3.8   | 4.2   | 0.9   | 0.9   | 1.0   | 1.2   |
| 32:1-DG          | 10.8          | 11.0        | 10.9          | 12.0        | 9.2           | 10.0        | 10.5            | 10.5          | 7.4   | 8.9   | 11.1  | 11.1  | 6.3   | 6.0   | 6.8   | 7.5   |
| 32:0-DG          | 6.2           | 5.6         | 4.6           | 4.6         | 12.8          | 11.7        | 8.1             | 7.4           | 9.9   | 8.5   | 7.6   | 6.4   | 11.6  | 11.0  | 11.3  | 13.0  |
| 34:3-DG          | 1.4           | 1.3         | 2.8           | 2.8         | 0.4           | 0.5         | 1.0             | 1.1           | 0.6   | 0.7   | 1.4   | 1.5   | 0.5   | 0.5   | 0.6   | 0.7   |
| 34:2-DG          | 15.5          | 15.1        | 19.5          | 20.8        | 6.5           | 6.9         | 10.7            | 11.7          | 6.5   | 7.5   | 12.9  | 13.5  | 4.6   | 5.0   | 5.8   | 6.7   |
| 34:1-DG          | 20.8          | 22.5        | 18.9          | 19.9        | 21.7          | 22.8        | 22.4            | 22.7          | 21.3  | 22.1  | 22.1  | 19.8  | 19.7  | 21.5  | 21.3  | 20.6  |
| 34:0-DG          | 3.9           | 4.1         | 2.9           | 3.0         | 12.1          | 10.6        | 7.6             | 7.2           | 9.8   | 7.9   | 5.6   | 4.3   | 13.7  | 15.6  | 15.6  | 14.8  |
| 36:5-DG          | 0.4           | 0.2         | 0.3           | 0.3         | 0.1           | 0.3         | 0.3             | 0.2           | 0.4   | 0.5   | 0.5   | 0.6   | 0.4   | 0.4   | 0.4   | 0.4   |
| 36:4-DG          | 1.1           | 0.8         | 1.3           | 1.0         | 0.8           | 0.8         | 0.9             | 0.8           | 1.4   | 1.3   | 1.3   | 1.6   | 1.0   | 0.9   | 1.1   | 1.1   |
| 36:3-DG          | 2.7           | 2.8         | 4.0           | 3.7         | 1.3           | 1.3         | 2.1             | 2.2           | 1.9   | 2.0   | 2.6   | 3.0   | 1.7   | 2.1   | 2.0   | 1.9   |
| 36:2-DG          | 11.8          | 12.5        | 11.6          | 9.4         | 7.3           | 7.7         | 10.4            | 10.9          | 8.7   | 9.6   | 9.6   | 10.4  | 7.3   | 7.3   | 7.6   | 6.9   |
| 36:1-DG          | 4.5           | 4.9         | 3.2           | 2.5         | 7.0           | 7.3         | 6.2             | 6.2           | 8.1   | 7.8   | 4.7   | 4.6   | 10.2  | 9.2   | 8.8   | 7.9   |
| 36:0-DG          | 0.6           | 0.5         | 0.2           | 0.2         | 1.2           | 1.1         | 0.9             | 0.8           | 1.3   | 1.1   | 0.6   | 0.5   | 2.1   | 1.6   | 1.7   | 1.5   |
| 38:6-DG          | 0.5           | 0.4         | 0.3           | 0.2         | 0.5           | 0.4         | 0.5             | 0.4           | 0.8   | 0.9   | 0.5   | 0.7   | 0.9   | 0.9   | 0.7   | 0.6   |
| 38:5-DG          | 1.2           | 1.0         | 0.7           | 0.6         | 1.3           | 1.1         | 1.0             | 0.9           | 2.1   | 2.0   | 1.5   | 1.5   | 1.7   | 1.8   | 1.6   | 1.6   |
| 38:4-DG          | 2.7           | 2.2         | 1.6           | 1.2         | 4.2           | 3.4         | 2.4             | 2.1           | 6.1   | 5.2   | 3.0   | 3.1   | 4.5   | 3.5   | 3.3   | 2.8   |
| 38:3-DG          | 3.0           | 2.8         | 2.2           | 1.6         | 2.6           | 2.6         | 2.6             | 3.0           | 3.6   | 3.5   | 2.5   | 2.9   | 3.2   | 2.6   | 2.6   | 2.2   |
| 38:2-DG          | 1.3           | 1.2         | 0.9           | 0.7         | 0.9           | 0.9         | 1.1             | 1.2           | 1.0   | 1.2   | 0.9   | 1.1   | 1.0   | 0.8   | 0.7   | 0.7   |
| 38:1-DG          | 0.2           | 0.2         | 0.1           | 0.1         | 0.2           | 0.3         | 0.3             | 0.3           | 0.2   | 0.2   | 0.1   | 0.2   | 0.3   | 0.4   | 0.3   | 0.2   |
| 40:7-DG          | 0.2           | 0.2         | 0.1           | 0.1         | 0.1           | 0.1         | 0.1             | 0.1           | 0.2   | 0.3   | 0.3   | 0.2   | 0.3   | 0.2   | 0.2   | 0.2   |
| 40:6-DG          | 0.5           | 0.4         | 0.3           | 0.3         | 0.5           | 0.4         | 0.5             | 0.4           | 1.0   | 0.8   | 0.6   | 0.7   | 1.1   | 0.9   | 0.9   | 0.9   |
| 40:5-DG          | 0.6           | 0.5         | 0.5           | 0.4         | 0.8           | 0.7         | 0.7             | 0.6           | 1.1   | 0.9   | 0.7   | 0.8   | 1.7   | 1.3   | 1.3   | 1.1   |
| 40:4-DG          | 0.4           | 0.3         | 0.4           | 0.4         | 0.4           | 0.5         | 0.5             | 0.4           | 0.5   | 0.5   | 0.5   | 0.5   | 0.8   | 0.7   | 0.6   | 0.5   |
| Total            | 100.0         | 100.0       | 100.0         | 100.0       | 100.0         | 100.0       | 100.0           | 100.0         | 100.0 | 100.0 | 100.0 | 100.0 | 100.0 | 100.0 | 100.0 | 100.0 |
| Free fatty acids | siCtr ethanol | siCtr 4-OHT | siBP1 ethanol | siBP1 4-OHT | siBP2 ethanol | siBP2 4-OHT | siBP1+2 ethanol | siBP1+2 4-OHT |       |       |       |       |       |       |       |       |
| 14:0-FAA         | 0.4           | 0.2         | 0.3           | 0.3         | 0.2           | 0.2         | 0.3             | 0.2           | 0.3   | 0.3   | 0.3   | 0.3   | 0.3   | 0.3   | 0.4   | 0.3   |
| 16:1-FAA         | 3.1           | 3.2         | 3.9           | 4.0         | 1.6           | 1.9         | 2.1             | 2.0           | 1.5   | 2.0   | 2.8   | 3.2   | 1.0   | 0.8   | 1.0   | 1.1   |
| 16:0-FAA         | 7.3           | 7.3         | 5.7           | 6.6         | 7.5           | 11.2        | 10.3            | 11.5          | 7.7   | 8.9   | 8.0   | 9.9   | 8.9   | 6.3   | 9.1   | 8.5   |
| 18:3-FAA         | 0.4           | 0.5         | 0.9           | 1.0         | 0.4           | 0.4         | 0.5             | 0.4           | 0.4   | 0.4   | 0.5   | 0.5   | 0.6   | 0.5   | 0.5   | 0.5   |
| 18:2-FAA         | 3.3           | 3.0         | 6.0           | 6.3         | 2.6           | 2.9         | 2.8             | 2.7           | 2.6   | 2.9   | 3.0   | 3.3   | 2.8   | 2.7   | 2.4   | 2.2   |
| 18:1-FAA         | 33.0          | 32.3        | 35.1          | 35.7        | 23.4          | 26.6        | 28.9            | 29.6          | 26.2  | 26.0  | 28.2  | 29.2  | 17.9  | 16.2  | 16.0  | 17.2  |
| 18:0-FAA         | 10.7          | 12.2        | 8.3           | 9.5         | 16.4          | 19.8        | 17.0            | 16.7          | 15.7  | 16.4  | 15.5  | 16.1  | 21.2  | 19.6  | 21.4  | 20.8  |
| 20:5-FAA         | 0.7           | 0.8         | 0.4           | 0.4         | 1.2           | 1.1         | 0.5             | 0.5           | 1.0   | 1.1   | 0.7   | 0.6   | 1.2   | 1.4   | 1.2   | 0.9   |
| 20:4-FAA         | 10.5          | 10.0        | 5.5           | 5.0         | 16.3          | 12.0        | 8.4             | 7.2           | 16.2  | 14.2  | 11.7  | 8.9   | 15.1  | 17.3  | 12.4  | 12.2  |
| 20:3-FAA         | 5.0           | 4.6         | 7.0           | 6.8         | 3.5           | 2.6         | 3.8             | 3.9           | 3.1   | 3.1   | 4.1   | 4.0   | 3.1   | 3.4   | 2.5   | 2.9   |
| 20:2-FAA         | 2.3           | 2.0         | 3.5           | 3.6         | 1.4           | 1.2         | 2.1             | 2.1           | 1.2   | 1.2   | 1.7   | 1.4   | 0.9   | 0.8   | 0.8   | 0.8   |
| 20:1-FAA         | 1.0           | 1.1         | 1.7           | 1.6         | 0.9           | 0.9         | 1.4             | 1.3           | 0.9   | 0.9   | 0.9   | 0.8   | 0.5   | 0.5   | 0.4   | 0.6   |
| 20:0-FAA         | 0.2           | 0.1         | 0.2           | 0.2         | 0.3           | 0.3         | 0.4             | 0.3           | 0.2   | 0.3   | 0.2   | 0.2   | 0.5   | 0.4   |       |       |

|              |              |              |              |              |              |              |              |              |              |              |              |              |              |              |              |              |
|--------------|--------------|--------------|--------------|--------------|--------------|--------------|--------------|--------------|--------------|--------------|--------------|--------------|--------------|--------------|--------------|--------------|
| 16:0-LPC     | 34.5         | 36.3         | 32.8         | 31.1         | 37.3         | 38.3         | 35.4         | 36.4         | 36.9         | 34.9         | 37.1         | 35.4         | 32.9         | 32.5         | 33.2         | 32.6         |
| 18:3-LPC     | 0.3          | 0.3          | 0.3          | 0.3          | 0.3          | 0.2          | 0.2          | 0.3          | 0.3          | 0.1          | 0.1          | 0.2          | 0.1          | 0.2          | 0.1          | 0.1          |
| 18:2-LPC     | 1.7          | 1.5          | 2.6          | 2.6          | 1.4          | 1.1          | 1.4          | 1.4          | 1.1          | 1.5          | 1.5          | 1.4          | 1.4          | 1.5          | 1.5          | 1.5          |
| 18:1-LPC     | 29.5         | 30.2         | 30.0         | 32.6         | 24.2         | 25.4         | 29.5         | 27.2         | 24.2         | 30.1         | 28.5         | 28.5         | 20.0         | 22.6         | 19.7         | 21.1         |
| 18:0-LPC     | 11.6         | 11.5         | 7.5          | 6.9          | 19.0         | 17.2         | 15.6         | 15.2         | 19.2         | 16.0         | 13.0         | 12.2         | 30.8         | 27.0         | 30.6         | 28.7         |
| 20:4-LPC     | 1.6          | 1.2          | 1.6          | 1.9          | 1.4          | 1.1          | 1.0          | 0.9          | 1.4          | 1.5          | 1.5          | 1.4          | 1.5          | 1.8          | 1.4          | 1.6          |
| 20:3-LPC     | 1.0          | 0.8          | 1.0          | 1.3          | 0.8          | 0.6          | 0.7          | 0.6          | 0.6          | 0.7          | 0.5          | 0.7          | 1.0          | 1.1          | 1.1          | 0.9          |
| 20:2-LPC     | 0.3          | 0.3          | 0.4          | 0.5          | 0.3          | 0.3          | 0.2          | 0.4          | 0.2          | 0.2          | 0.1          | 0.2          | 0.2          | 0.2          | 0.2          | 0.2          |
| 20:1-LPC     | 0.9          | 0.9          | 0.6          | 0.9          | 0.9          | 0.8          | 0.7          | 0.6          | 0.8          | 0.6          | 0.5          | 0.4          | 0.5          | 0.6          | 0.5          | 0.4          |
| 20:0-LPC     | 0.2          | 0.3          | 0.2          | 0.2          | 0.3          | 0.2          | 0.1          | 0.3          | 0.3          | 0.2          | 0.1          | 0.1          | 0.4          | 0.0          | 0.4          | 0.3          |
| 22:6-LPC     | 0.5          | 0.3          | 0.2          | 0.4          | 0.4          | 0.3          | 0.2          | 0.2          | 0.5          | 0.6          | 0.2          | 0.4          | 0.6          | 0.4          | 0.4          | 0.5          |
| 22:5-LPC     | 0.4          | 0.3          | 0.3          | 0.3          | 0.5          | 0.4          | 0.3          | 0.4          | 0.5          | 0.5          | 0.3          | 0.4          | 0.6          | 0.8          | 0.6          | 0.7          |
| 22:4-LPC     | 0.1          | 0.1          | 0.2          | 0.2          | 0.3          | 0.1          | 0.1          | 0.1          | 0.2          | 0.2          | 0.2          | 0.2          | 0.2          | 0.7          | 0.2          | 0.2          |
| 16:2-aLPC    | 0.2          | 0.1          | 0.1          | 0.1          | 0.2          | 0.2          | 0.1          | 0.2          | 0.1          | 0.1          | 0.1          | 0.1          | 0.2          | 0.2          | 0.1          | 0.1          |
| 16:1-aLPC    | 0.7          | 0.7          | 0.5          | 0.5          | 0.6          | 0.4          | 0.4          | 0.5          | 0.6          | 0.5          | 0.4          | 0.5          | 0.4          | 0.1          | 0.3          | 0.4          |
| 16:0-aLPC    | 3.3          | 3.1          | 3.5          | 2.9          | 2.5          | 3.1          | 2.2          | 2.7          | 2.5          | 2.5          | 2.9          | 2.8          | 2.2          | 0.5          | 2.8          | 3.2          |
| 18:2-aLPC    | 0.1          | 0.1          | 0.1          | 0.1          | 0.1          | 0.1          | 0.1          | 0.2          | 0.1          | 0.1          | 0.1          | 0.1          | 0.0          | 0.1          | 0.2          | 0.1          |
| 18:1-aLPC    | 1.1          | 1.0          | 0.8          | 0.9          | 0.8          | 0.8          | 0.5          | 0.7          | 1.1          | 0.9          | 0.7          | 0.7          | 0.8          | 0.1          | 0.7          | 0.8          |
| 20:0-aLPC    | 0.1          | 0.2          | 0.1          | 0.2          | 0.2          | 0.2          | 0.1          | 0.1          | 0.3          | 0.2          | 0.1          | 0.1          | 0.2          | 0.6          | 0.1          | 0.1          |
| 22:0-aLPC    | 0.5          | 0.5          | 0.6          | 0.6          | 0.5          | 0.4          | 0.4          | 0.7          | 0.6          | 0.4          | 0.4          | 0.6          | 0.5          | 0.2          | 0.4          | 0.4          |
| 24:1-aLPC    | 0.7          | 0.7          | 0.8          | 0.8          | 0.3          | 0.4          | 0.2          | 0.6          | 0.7          | 0.6          | 0.4          | 0.8          | 0.5          | 0.5          | 0.3          | 0.4          |
| 24:0-aLPC    | 0.9          | 0.9          | 1.2          | 0.9          | 1.1          | 1.1          | 1.3          | 1.8          | 1.5          | 1.2          | 1.6          | 1.9          | 1.2          | 0.4          | 1.1          | 1.1          |
| 26:1-aLPC    | 0.4          | 0.4          | 0.5          | 0.4          | 0.1          | 0.2          | 0.2          | 0.4          | 0.5          | 0.4          | 0.3          | 0.7          | 0.2          | 1.2          | 0.3          | 0.3          |
| <b>Total</b> | <b>100.0</b> | <b>100.0</b> | <b>100.0</b> | <b>100.0</b> | <b>100.0</b> | <b>100.0</b> | <b>100.0</b> | <b>100.0</b> | <b>100.0</b> | <b>100.0</b> | <b>100.0</b> | <b>100.0</b> | <b>100.0</b> | <b>100.0</b> | <b>100.0</b> | <b>100.0</b> |

|                         |                      |                    |                      |                    |                      |                    |                        |                      |               |              |              |              |              |              |              |              |
|-------------------------|----------------------|--------------------|----------------------|--------------------|----------------------|--------------------|------------------------|----------------------|---------------|--------------|--------------|--------------|--------------|--------------|--------------|--------------|
| <b>Monoacylglycerol</b> | <b>siCtr ethanol</b> | <b>siCtr 4-OHT</b> | <b>siBP1 ethanol</b> | <b>siBP1 4-OHT</b> | <b>siBP2 ethanol</b> | <b>siBP2 4-OHT</b> | <b>siBP1+2 ethanol</b> | <b>siBP1+2 4-OHT</b> |               |              |              |              |              |              |              |              |
| 16:1-MG                 | 4.2                  | 5.1                | 6.3                  | 8.9                | 3.9                  | 5.3                | 6.1                    | 5.5                  | 2.80          | 2.3          | 3.6          | 3.1          | 1.0          | 0.9          | 0.8          | 1.4          |
| 16:0-MG                 | 44.3                 | 33.6               | 46.8                 | 38.2               | 35.7                 | 24.9               | 26.9                   | 28.8                 | 40.47         | 33.4         | 46.2         | 37.0         | 31.3         | 26.6         | 30.9         | 35.2         |
| 18:1-MG                 | 40.4                 | 51.1               | 39.0                 | 46.6               | 48.8                 | 58.9               | 59.2                   | 55.9                 | 59.87         | 49.4         | 34.2         | 44.5         | 41.4         | 53.7         | 41.4         | 44.2         |
| 18:0-MG                 | 11.1                 | 10.2               | 8.0                  | 6.4                | 11.6                 | 10.9               | 7.8                    | 9.8                  | 17.99         | 14.8         | 16.0         | 15.4         | 26.3         | 18.8         | 26.9         | 19.1         |
| <b>Total</b>            | <b>100.0</b>         | <b>100.0</b>       | <b>100.0</b>         | <b>100.0</b>       | <b>100.0</b>         | <b>100.0</b>       | <b>100.0</b>           | <b>100.0</b>         | <b>121.12</b> | <b>100.0</b> | <b>100.0</b> | <b>100.0</b> | <b>100.0</b> | <b>100.0</b> | <b>100.0</b> | <b>100.0</b> |

|                          |                      |                    |                      |                    |                      |                    |                        |                      |              |              |              |              |              |              |              |              |
|--------------------------|----------------------|--------------------|----------------------|--------------------|----------------------|--------------------|------------------------|----------------------|--------------|--------------|--------------|--------------|--------------|--------------|--------------|--------------|
| <b>Phosphatidic acid</b> | <b>siCtr ethanol</b> | <b>siCtr 4-OHT</b> | <b>siBP1 ethanol</b> | <b>siBP1 4-OHT</b> | <b>siBP2 ethanol</b> | <b>siBP2 4-OHT</b> | <b>siBP1+2 ethanol</b> | <b>siBP1+2 4-OHT</b> |              |              |              |              |              |              |              |              |
| 30:1-PA                  | 1.1                  | 0.9                | 1.6                  | 2.0                | 1.44                 | 0.8                | 0.9                    | 0.9                  | 0.3          | 0.4          | 1.2          | 0.9          | 0.1          | 0.1          | 0.1          | 0.1          |
| 30:0-PA                  | 2.3                  | 2.3                | 2.4                  | 2.7                | 7.34                 | 4.1                | 1.7                    | 1.6                  | 2.4          | 2.9          | 2.6          | 1.6          | 2.9          | 3.1          | 2.0          | 2.8          |
| 32:2-PA                  | 1.7                  | 1.6                | 3.6                  | 3.9                | 1.28                 | 0.7                | 2.1                    | 2.1                  | 0.6          | 0.8          | 1.8          | 2.3          | 0.1          | 0.1          | 0.2          | 0.2          |
| 32:1-PA                  | 8.1                  | 8.6                | 11.1                 | 11.1               | 14.26                | 7.9                | 8.8                    | 9.8                  | 7.0          | 7.8          | 9.1          | 8.7          | 2.4          | 2.7          | 3.4          | 3.6          |
| 32:0-PA                  | 6.4                  | 6.9                | 6.4                  | 6.8                | 33.51                | 18.5               | 9.2                    | 9.4                  | 16.7         | 15.4         | 12.2         | 9.1          | 22.1         | 25.4         | 20.2         | 27.1         |
| 34:3-PA                  | 1.2                  | 1.1                | 2.8                  | 2.8                | 0.87                 | 0.5                | 1.5                    | 1.3                  | 0.6          | 0.6          | 1.1          | 1.8          | 0.4          | 0.5          | 0.5          | 0.4          |
| 34:2-PA                  | 5.7                  | 5.5                | 9.4                  | 9.4                | 5.92                 | 3.3                | 6.7                    | 7.3                  | 3.7          | 4.6          | 7.4          | 8.3          | 1.6          | 1.8          | 2.5          | 2.1          |
| 34:1-PA                  | 21.5                 | 21.7               | 22.9                 | 22.5               | 36.42                | 20.1               | 26.1                   | 25.9                 | 23.1         | 26.6         | 26.2         | 23.8         | 14.6         | 15.3         | 17.9         | 15.1         |
| 34:0-PA                  | 3.4                  | 3.1                | 2.9                  | 2.9                | 18.81                | 10.4               | 7.2                    | 7.0                  | 12.6         | 12.0         | 6.9          | 5.1          | 22.7         | 27.3         | 24.4         | 24.6         |
| 36:4-PA                  | 0.7                  | 0.7                | 0.8                  | 1.2                | 1.05                 | 0.6                | 1.0                    | 0.8                  | 1.1          | 0.6          | 0.7          | 1.9          | 0.9          | 0.6          | 0.9          | 0.9          |
| 36:3-PA                  | 1.6                  | 1.2                | 2.4                  | 2.9                | 1.51                 | 0.8                | 2.0                    | 1.7                  | 1.3          | 1.0          | 1.4          | 3.0          | 1.3          | 1.4          | 1.6          | 1.2          |
| 36:2-PA                  | 20.6                 | 25.0               | 19.1                 | 17.4               | 21.49                | 11.9               | 9.0                    | 9.5                  | 7.3          | 7.2          | 9.0          | 10.3         | 4.7          | 4.5          | 5.7          | 4.3          |
| 36:1-PA                  | 13.1                 | 13.2               | 8.3                  | 6.9                | 16.83                | 9.3                | 13.5                   | 11.5                 | 12.4         | 12.5         | 12.7         | 10.8         | 11.4         | 9.6          | 11.2         | 8.7          |
| 36:0-PA                  | 0.6                  | 0.3                | 0.2                  | 0.3                | 1.54                 | 0.9                | 0.8                    | 0.6                  | 1.2          | 1.1          | 0.7          | 0.6          | 2.4          | 2.8          | 2.8          | 2.3          |
| 38:6-PA                  | 0.3                  | 0.2                | 0.1                  | 0.3                | 0.79                 | 0.4                | 0.3                    | 0.4                  | 0.8          | 0.6          | 0.2          | 0.9          | 1.4          | 0.5          | 0.7          | 0.8          |
| 38:5-PA                  | 0.7                  | 0.5                | 0.4                  | 0.6                | 1.09                 | 0.6                | 0.8                    | 1.0                  | 1.4          | 1.0          | 0.8          | 1.9          | 1.9          | 0.8          | 1.1          | 1.1          |
| 38:4-PA                  | 1.3                  | 0.9                | 0.6                  | 1.1                | 2.07                 | 1.1                | 1.2                    | 1.2                  | 2.7          | 1.9          | 1.4          | 2.3          | 2.3          | 1.1          | 1.3          | 1.3          |
| 38:3-PA                  | 1.2                  | 1.0                | 0.7                  | 1.0                | 2.09                 | 1.2                | 1.1                    | 1.3                  | 1.5          | 0.8          | 1.1          | 2.3          | 1.6          | 0.9          | 1.1          | 0.8          |
| 38:2-PA                  | 0.5                  | 0.2                | 0.2                  | 0.2                | 0.46                 | 0.3                | 0.3                    | 0.3                  | 0.3          | 0.2          | 0.3          | 0.6          | 0.4          | 0.2          | 0.3          | 0.2          |
| 40:6-PA                  | 1.5                  | 1.1                | 0.6                  | 1.4                | 3.42                 | 1.9                | 1.6                    | 1.6                  | 1.4          | 1.0          | 1.5          | 1.7          | 1.8          | 0.6          | 1.0          | 1.0          |
| 40:5-PA                  | 2.5                  | 1.5                | 1.3                  | 1.3                | 3.86                 | 2.1                | 2.1                    | 2.1                  | 1.3          | 0.8          | 1.8          | 1.6          | 2.4          | 0.6          | 0.8          | 0.8          |
| 40:4-PA                  | 4.0                  | 2.3                | 2.3                  | 1.2                | 5.03                 | 2.8                | 2.1                    | 2.5                  | 0.4          | 0.2          | 0.0          | 0.6          | 0.7          | 0.3          | 0.4          | 0.4          |
| <b>Total</b>             | <b>100.0</b>         | <b>100.0</b>       | <b>100.0</b>         | <b>100.0</b>       | <b>181.08</b>        | <b>100.0</b>       | <b>100.0</b>           | <b>100.0</b>         | <b>100.0</b> | <b>100.0</b> | <b>100.0</b> | <b>100.0</b> | <b>100.0</b> | <b>100.0</b> | <b>100.0</b> | <b>100.0</b> |

|                            |                      |                    |                      |                    |                      |                    |                        |                      |      |      |      |      |      |      |      |      |
|----------------------------|----------------------|--------------------|----------------------|--------------------|----------------------|--------------------|------------------------|----------------------|------|------|------|------|------|------|------|------|
| <b>Phosphatidylcholine</b> | <b>siCtr ethanol</b> | <b>siCtr 4-OHT</b> | <b>siBP1 ethanol</b> | <b>siBP1 4-OHT</b> | <b>siBP2 ethanol</b> | <b>siBP2 4-OHT</b> | <b>siBP1+2 ethanol</b> | <b>siBP1+2 4-OHT</b> |      |      |      |      |      |      |      |      |
| 26:0-PC                    | 0.0                  | 0.0                | 0.0                  | 0.0                | 0.0                  | 0.1                | 0.0                    | 0.0                  | 0.1  | 0.1  | 0.0  | 0.1  | 0.1  | 0.1  | 0.1  | 0.1  |
| 28:1-PC                    | 0.1                  | 0.2                | 0.1                  | 0.1                | 0.1                  | 0.1                | 0.1                    | 0.1                  | 0.1  | 0.1  | 0.1  | 0.2  | 0.1  | 0.1  | 0.0  | 0.1  |
| 28:0-PC                    | 1.1                  | 1.8                | 0.9                  | 1.0                | 1.5                  | 2.2                | 0.9                    | 1.3                  | 1.1  | 1.1  | 1.0  | 1.4  | 1.2  | 0.8  | 0.7  | 0.8  |
| 30:2-PC                    | 0.3                  | 0.2                | 0.2                  | 0.2                | 0.1                  | 0.1                | 0.1                    | 0.1                  | 0.0  | 0.1  | 0.1  | 0.2  | 0.0  | 0.0  | 0.0  | 0.0  |
| 30:1-PC                    | 3.9                  | 3.2                | 2.0                  | 2.3                | 3.1                  | 2.3                | 1.7                    | 2.5                  | 1.4  | 1.5  | 1.5  | 2.8  | 1.1  | 0.8  | 0.7  | 0.8  |
| 30:0-PC                    | 12.7                 | 13.3               | 5.3                  | 5.9                | 16.5                 | 12.3               | 7.0                    | 9.1                  | 9.0  | 8.3  | 6.8  | 11.1 | 10.8 | 6.9  | 6.6  | 7.3  |
| 32:3-PC                    | 0.1                  | 0.1                | 0.3                  | 0.3                | 0.0                  | 0.0                | 0.1                    | 0.1                  | 0.1  | 0.1  | 0.1  | 0.1  | 0.1  | 0.0  | 0.0  | 0.0  |
| 32:2-PC                    | 2.0                  | 2.0                | 3.5                  | 4.6                | 1.1                  | 1.1                | 1.5                    | 2.2                  | 1.2  | 1.1  | 1.4  | 2.1  | 0.6  | 0.5  | 0.5  | 0.7  |
| 32:1-PC                    | 13.8                 | 12.3               | 10.7                 | 14.0               | 12.1                 | 11.7               | 9.4                    | 14.8                 | 9.3  | 7.8  | 8.1  | 11.2 | 7.2  | 5.5  | 5.3  | 5.5  |
| 32:0-PC                    | 13.2                 | 10.7               | 6.2                  | 7.7                | 12.3                 | 9.8                | 6.4                    | 9.9                  | 8.9  | 8.1  | 7.8  | 11.1 | 12.2 | 8.5  | 9.1  | 9.8  |
| 34:4-PC                    | 0.1                  | 0.1                | 0.1                  | 0.1                | 0.0                  | 0.1                | 0.1                    | 0.0                  | 0.1  | 0.1  | 0.1  | 0.1  | 0.0  | 0.1  | 0.1  | 0.1  |
| 34:3-PC                    | 0.6                  | 0.6                | 1.8                  | 1.2                | 0.3                  | 0.3                | 0.9                    | 0.5                  | 0.6  | 0.7  | 0.9  | 0.8  | 0.4  | 0.4  | 0.4  | 0.5  |
| 34:2-PC                    | 4.1                  | 4.3                | 10.9                 | 8.8                | 2.6                  | 2.8                | 5.6                    | 4.6                  | 4.3  | 4.6  | 5.1  | 5.3  | 2.5  | 2.3  | 2.3  | 3.0  |
| 34:1-PC                    | 16.0                 | 16.7               | 23.0                 | 25.9               | 17.0                 | 17.3               | 19.8                   | 22.7                 | 24.3 | 20.7 | 16.0 | 18.2 | 16.3 | 13.8 | 12.4 | 14.8 |
| 34:0-PC                    | 2.5                  | 2.5                | 2.9                  | 3.5                | 3.2                  | 3.0                | 3.0                    | 3.6                  | 4.2  | 3.5  | 2.5  | 3.0  | 4.6  | 3.6  | 3.3  | 3.6  |
| 36:5-PC                    | 0.4                  | 0.4                | 0.4                  | 0.3                | 0.4                  | 0.4                | 0.4                    | 0.3                  | 0.4  | 0.5  | 0.9  | 0.4  | 0.4  | 0.6  | 0.6  | 0.6  |
| 36:4-PC                    | 1.2                  | 1.3                | 1.1                  | 0.9                | 1.4                  | 1.4                | 1.7                    | 0.9                  | 1.5  | 2.0  | 2.9  | 1.3  | 1.5  | 2.5  | 2.6  | 2.6  |
| 36:3-PC                    | 1.7                  | 1.7                | 2.4                  | 1.7                | 1.5                  | 1.5                | 2.8                    | 1.4                  | 1.7  | 2.8  | 3.2  | 1.8  | 1.8  | 2.5  | 2.6  | 2.9  |
| 36:2-PC                    | 5.6                  | 5.7                | 8.1                  | 5.1                | 4.8                  | 5.0                | 11.4                   | 5.5                  | 6.3  | 9.8  | 9.2  | 5.8  | 4.8  | 6.1  | 6.3  | 7.2  |
| 36:1-PC                    | 2.6                  | 2.7                | 3.3                  | 2.0                | 4.5                  | 4.1                | 7.8                    | 3.9                  | 5.7  | 7.1  | 4.7  | 3.1  | 6.8  | 7.4  | 7.6  | 8.3  |
| 36:0-PC                    | 0.2                  | 0.2                | 0.2                  | 0.1                | 0.5                  | 0.5                | 0.8                    | 0.4                  | 0.6  | 0.8  | 0.4  | 0.3  | 0.9  | 1.0  | 1.0  | 1.1  |
| 38:7-PC                    | 0.1                  | 0.1                | 0.1                  | 0.1                | 0.1                  | 0.1                | 0.1                    | 0.1                  | 0.1  | 0.1  | 0.2  | 0.2  | 0.1  | 0.2  | 0.2  | 0.1  |
| 38:6-PC                    | 0.8                  | 0.9                | 0.6                  | 0.5                | 0.9                  | 1.0                | 0.8                    | 0.7                  | 0.9  | 1.0  | 1.7  | 0.8  | 1.2  | 2.0  | 1.9  | 1.6  |
| 38:5-PC                    | 1.6                  | 1.8                | 1.3                  | 1.2                | 1.6                  | 1.9                | 1.7                    | 1.3                  | 1.6  | 1.8  | 3.2  | 1.6  | 1.9  | 3.2  | 3.3  | 2.9  |
| 38:4-PC                    | 1.6                  | 1.8                | 1.5                  | 1.3                | 1.9                  | 2.2                | 2.1                    | 1.5                  | 1.9  | 2.1  | 3.6  | 1.7  | 2.8  | 4.6  | 4.8  | 4.2  |
| 38:3-PC                    | 0.8                  | 0.9                | 0.8                  | 0.7                | 0.9                  | 0.9                | 1.2                    | 0.8                  | 0.8  | 1.1  | 1.7  | 0.8  | 1.2  | 2.0  | 2.1  |      |



|              |              |              |              |              |              |              |              |              |              |              |              |              |              |              |              |              |
|--------------|--------------|--------------|--------------|--------------|--------------|--------------|--------------|--------------|--------------|--------------|--------------|--------------|--------------|--------------|--------------|--------------|
| 46:8-aPE     | 0.1          | 0.1          | 0.1          | 0.1          | 0.2          | 0.2          | 0.1          | 0.1          | 0.0          | 0.0          | 0.0          | 0.0          | 0.0          | 0.0          | 0.0          | 0.0          |
| 46:7-aPE     | 0.1          | 0.0          | 0.1          | 0.1          | 0.2          | 0.2          | 0.1          | 0.1          | 0.0          | 0.0          | 0.0          | 0.0          | 0.0          | 0.0          | 0.0          | 0.0          |
| 46:6-aPE     | 0.0          | 0.0          | 0.0          | 0.0          | 0.1          | 0.1          | 0.1          | 0.1          | 0.0          | 0.0          | 0.0          | 0.1          | 0.0          | 0.0          | 0.0          | 0.0          |
| 46:5-aPE     | 0.0          | 0.0          | 0.0          | 0.0          | 0.0          | 0.0          | 0.0          | 0.0          | 0.0          | 0.0          | 0.0          | 0.0          | 0.1          | 0.0          | 0.0          | 0.0          |
| <b>Total</b> | <b>100.0</b> | <b>100.0</b> | <b>100.0</b> | <b>100.0</b> | <b>100.0</b> | <b>100.0</b> | <b>100.0</b> | <b>100.0</b> | <b>100.0</b> | <b>100.0</b> | <b>100.0</b> | <b>100.0</b> | <b>100.0</b> | <b>100.0</b> | <b>100.0</b> | <b>100.0</b> |

| Phosphatidylglycerol | siCtr ethanol | siCtr 4-OHT  | siBP1 ethanol | siBP1 4-OHT  | siBP2 ethanol | siBP2 4-OHT  | siBP1+2 ethanol | siBP1+2 4-OHT |
|----------------------|---------------|--------------|---------------|--------------|---------------|--------------|-----------------|---------------|
| 32:2-PG              | 0.3           | 0.4          | 0.7           | 0.9          | 0.3           | 0.4          | 0.4             | 0.5           |
| 32:1-PG              | 0.9           | 1.0          | 1.2           | 1.5          | 1.4           | 1.4          | 1.5             | 1.7           |
| 32:0-PG              | 0.4           | 0.4          | 0.4           | 0.5          | 1.0           | 1.0          | 0.9             | 1.0           |
| 34:4-PG              | 0.0           | 0.1          | 0.1           | 0.1          | 0.1           | 0.0          | 0.1             | 0.0           |
| 34:3-PG              | 0.8           | 0.8          | 1.1           | 1.4          | 0.5           | 0.7          | 1.0             | 1.0           |
| 34:2-PG              | 3.8           | 4.0          | 5.4           | 6.3          | 3.4           | 4.1          | 5.2             | 5.7           |
| 34:1-PG              | 4.8           | 5.1          | 6.2           | 8.4          | 7.6           | 9.1          | 8.1             | 8.5           |
| 34:0-PG              | 0.7           | 0.8          | 1.1           | 1.2          | 1.8           | 2.1          | 1.7             | 1.8           |
| 36:4-PG              | 0.9           | 1.0          | 1.4           | 1.6          | 1.1           | 1.0          | 1.3             | 1.2           |
| 36:3-PG              | 2.9           | 3.4          | 4.4           | 4.7          | 2.8           | 2.9          | 3.9             | 4.1           |
| 36:2-PG              | 10.3          | 10.0         | 10.7          | 12.4         | 7.7           | 9.0          | 12.1            | 13.2          |
| 36:1-PG              | 3.9           | 3.8          | 4.4           | 5.5          | 7.3           | 8.0          | 7.9             | 7.7           |
| 38:7-PG              | 2.4           | 2.2          | 2.2           | 2.0          | 1.8           | 1.9          | 1.9             | 1.9           |
| 38:6-PG              | 3.6           | 3.6          | 3.0           | 2.8          | 4.1           | 4.6          | 4.0             | 3.9           |
| 38:5-PG              | 4.0           | 4.0          | 4.4           | 3.8          | 3.9           | 3.8          | 4.6             | 4.2           |
| 38:4-PG              | 2.8           | 2.8          | 3.7           | 3.5          | 2.4           | 2.3          | 2.8             | 3.1           |
| 38:3-PG              | 1.6           | 1.6          | 2.1           | 2.3          | 1.1           | 1.1          | 1.5             | 1.7           |
| 38:2-PG              | 0.6           | 0.6          | 1.0           | 1.1          | 0.5           | 0.8          | 0.7             | 0.9           |
| 40:9-PG              | 0.2           | 0.2          | 0.2           | 0.1          | 0.2           | 0.2          | 0.1             | 0.1           |
| 40:8-PG              | 3.0           | 2.9          | 2.7           | 2.1          | 2.1           | 1.8          | 2.0             | 1.9           |
| 40:7-PG              | 17.8          | 17.0         | 12.8          | 10.0         | 11.7          | 11.2         | 11.5            | 11.0          |
| 40:6-PG              | 7.3           | 7.1          | 5.7           | 4.5          | 6.8           | 6.1          | 6.5             | 6.0           |
| 40:5-PG              | 2.0           | 1.9          | 1.8           | 1.5          | 2.0           | 1.8          | 2.1             | 2.0           |
| 40:4-PG              | 0.5           | 0.5          | 0.6           | 0.5          | 0.4           | 0.4          | 0.5             | 0.4           |
| 42:11-PG             | 0.6           | 0.7          | 0.5           | 0.5          | 0.7           | 0.5          | 0.4             | 0.4           |
| 42:10-PG             | 2.7           | 2.8          | 2.8           | 2.6          | 2.8           | 2.3          | 2.2             | 1.9           |
| 42:9-PG              | 2.7           | 2.7          | 2.8           | 2.3          | 2.5           | 2.1          | 2.1             | 1.8           |
| 42:8-PG              | 1.8           | 1.9          | 1.7           | 1.6          | 1.5           | 1.2          | 1.3             | 1.1           |
| 42:7-PG              | 0.9           | 0.8          | 0.7           | 0.6          | 0.6           | 0.6          | 0.5             | 0.4           |
| 42:6-PG              | 0.2           | 0.2          | 0.2           | 0.1          | 0.2           | 0.1          | 0.1             | 0.1           |
| 44:12-PG             | 8.0           | 8.2          | 7.2           | 7.3          | 9.4           | 8.7          | 5.0             | 4.9           |
| 44:11-PG             | 5.0           | 5.2          | 4.6           | 4.4          | 6.8           | 6.1          | 4.0             | 3.6           |
| 44:10-PG             | 1.9           | 1.9          | 1.7           | 1.5          | 2.8           | 2.2          | 1.6             | 1.4           |
| 44:9-PG              | 0.5           | 0.6          | 0.5           | 0.4          | 0.8           | 0.6          | 0.5             | 0.4           |
| <b>Total</b>         | <b>100.0</b>  | <b>100.0</b> | <b>100.0</b>  | <b>100.0</b> | <b>100.0</b>  | <b>100.0</b> | <b>100.0</b>    | <b>100.0</b>  |

| Phosphatidylinositol | siCtr ethanol | siCtr 4-OHT  | siBP1 ethanol | siBP1 4-OHT  | siBP2 ethanol | siBP2 4-OHT  | siBP1+2 ethanol | siBP1+2 4-OHT |
|----------------------|---------------|--------------|---------------|--------------|---------------|--------------|-----------------|---------------|
| 30:1-PI              | 0.1           | 0.0          | 0.1           | 0.2          | 0.0           | 0.1          | 0.1             | 0.0           |
| 30:0-PI              | 0.1           | 0.1          | 0.1           | 0.1          | 0.3           | 0.3          | 0.2             | 0.3           |
| 32:2-PI              | 0.5           | 0.5          | 0.8           | 0.9          | 0.2           | 0.2          | 0.3             | 0.4           |
| 32:1-PI              | 2.7           | 2.8          | 2.8           | 3.0          | 2.7           | 2.8          | 2.5             | 3.1           |
| 32:0-PI              | 1.7           | 1.8          | 1.4           | 1.5          | 5.1           | 5.0          | 3.5             | 4.1           |
| 34:3-PI              | 0.4           | 0.4          | 0.7           | 0.8          | 0.1           | 0.1          | 0.3             | 0.3           |
| 34:2-PI              | 7.1           | 7.7          | 8.7           | 9.1          | 3.6           | 3.8          | 5.5             | 5.7           |
| 34:1-PI              | 15.5          | 16.3         | 13.4          | 15.6         | 17.8          | 18.2         | 18.5            | 18.0          |
| 36:4-PI              | 1.3           | 1.2          | 1.0           | 1.0          | 1.4           | 1.1          | 0.8             | 0.8           |
| 36:3-PI              | 2.7           | 2.7          | 3.8           | 3.8          | 1.5           | 1.6          | 2.1             | 2.1           |
| 36:2-PI              | 11.9          | 12.1         | 12.1          | 12.5         | 7.6           | 7.6          | 10.3            | 10.3          |
| 36:1-PI              | 9.3           | 9.5          | 9.3           | 9.8          | 10.0          | 9.5          | 12.4            | 12.2          |
| 38:0-PI              | 1.2           | 1.1          | 1.1           | 1.3          | 1.5           | 1.4          | 1.7             | 1.6           |
| 38:6-PI              | 0.6           | 0.6          | 0.5           | 0.5          | 0.6           | 0.7          | 0.5             | 0.5           |
| 38:5-PI              | 5.1           | 5.0          | 3.3           | 3.0          | 4.4           | 4.6          | 3.0             | 2.9           |
| 38:4-PI              | 14.7          | 14.3         | 11.3          | 10.0         | 19.7          | 18.3         | 12.5            | 11.4          |
| 38:3-PI              | 12.0          | 12.1         | 14.3          | 13.0         | 9.6           | 9.8          | 11.0            | 11.1          |
| 38:2-PI              | 3.2           | 3.2          | 4.4           | 4.2          | 2.1           | 2.4          | 3.3             | 3.4           |
| 38:1-PI              | 0.4           | 0.4          | 0.5           | 0.5          | 0.3           | 0.4          | 0.6             | 0.6           |
| 40:7-PI              | 0.8           | 0.7          | 0.7           | 0.6          | 0.6           | 0.6          | 0.5             | 0.6           |
| 40:6-PI              | 2.7           | 2.3          | 2.6           | 2.3          | 2.8           | 3.1          | 2.6             | 2.6           |
| 40:5-PI              | 3.3           | 2.9          | 3.1           | 2.8          | 4.5           | 4.7          | 4.0             | 4.0           |
| 40:4-PI              | 2.0           | 1.9          | 2.6           | 2.3          | 2.8           | 2.7          | 2.8             | 2.7           |
| 40:3-PI              | 0.6           | 0.6          | 1.1           | 1.0          | 0.6           | 0.7          | 0.8             | 0.8           |
| 42:7-PI              | 0.1           | 0.0          | 0.1           | 0.0          | 0.0           | 0.1          | 0.0             | 0.0           |
| 42:6-PI              | 0.1           | 0.0          | 0.1           | 0.1          | 0.1           | 0.1          | 0.1             | 0.1           |
| 42:5-PI              | 0.1           | 0.0          | 0.1           | 0.1          | 0.1           | 0.1          | 0.1             | 0.1           |
| 42:4-PI              | 0.0           | 0.0          | 0.1           | 0.1          | 0.0           | 0.0          | 0.0             | 0.0           |
| <b>Total</b>         | <b>100.0</b>  | <b>100.0</b> | <b>100.0</b>  | <b>100.0</b> | <b>100.0</b>  | <b>100.0</b> | <b>100.0</b>    | <b>100.0</b>  |

| Phosphatidylserine | siCtr ethanol | siCtr 4-OHT | siBP1 ethanol | siBP1 4-OHT | siBP2 ethanol | siBP2 4-OHT | siBP1+2 ethanol | siBP1+2 4-OHT |
|--------------------|---------------|-------------|---------------|-------------|---------------|-------------|-----------------|---------------|
| 32:1-PS            | 0.8           | 0.7         | 1.8           | 2.1         | 0.3           | 0.4         | 0.9             | 0.3           |
| 32:0-PS            | 0.6           | 0.5         | 1.0           | 1.3         | 0.1           | 0.2         | 0.2             | 0.6           |
| 34:2-PS            | 0.7           | 1.0         | 1.1           | 1.6         | 0.2           | 0.3         | 0.4             | 0.3           |
| 34:1-PS            | 8.7           | 8.0         | 9.2           | 9.9         | 6.1           | 6.2         | 7.2             | 7.4           |
| 34:0-PS            | 1.6           | 1.3         | 1.5           | 1.5         | 1.0           | 0.9         | 0.9             | 0.9           |
| 36:3-PS            | 0.3           | 0.2         | 0.3           | 0.3         | 0.1           | 0.1         | 0.1             | 0.1           |
| 36:2-PS            | 4.9           | 5.7         | 5.1           | 4.7         | 3.2           | 3.1         | 3.5             | 3.5           |
| 36:1-PS            | 25.8          | 24.6        | 17.3          | 16.3        | 28.8          | 25.2        | 24.5            | 23.2          |
| 38:0-PS            | 3.1           | 2.7         | 1.8           | 1.8         | 3.3           | 2.8         | 2.7             | 2.8           |
| 38:6-PS            | 0.3           | 0.3         | 0.0           | 0.0         | 0.1           | 0.0         | 0.0             | 0.2           |
| 38:5-PS            | 1.6           | 1.7         | 0.4           | 0.4         | 1.6           | 0.2         | 0.2             | 0.1           |
| 38:4-PS            | 2.2           | 2.2         | 1.6           | 1.5         | 1.1           | 1.6         | 1.8             | 1.1           |
| 38:3-PS            | 2.2           | 2.3         | 1.8           | 1.8         | 2.2           | 2.6         | 2.0             | 2.1           |
| 38:2-PS            | 0.7           | 0.6         | 0.5           | 0.5         | 0.3           | 0.4         | 0.3             | 0.4           |
| 38:1-PS            | 0.3           | 0.2         | 0.1           | 0.2         | 0.1           | 0.1         | 0.1             | 0.1           |
| 40:7-PS            | 0.1           | 0.2         | 0.3           | 0.2         | 0.1           | 0.2         | 0.2             | 0.1           |
| 40:6-PS            | 2.4           | 2.8         | 3.9           | 3.2         | 2.5           | 6.2         | 3.8             | 4.5           |
| 40:5-PS            | 3.2           | 3.7         | 4.3           | 3.9         | 4.9           | 7.1         | 5.0             | 5.7           |
| 40:4-PS            | 0.8           | 1.3         | 2.8           | 1.8         | 2.9           | 3.6         | 2.8             | 2.9           |
| 40:3-PS            | 0.3           | 0.3         | 0.5           | 0.4         | 0.4           | 0.7         | 0.3             | 0.4           |
| 42:8-PS            | 0.6           | 0.6         | 0.5           | 0.6         | 0.6           | 0.6         | 0.5             | 0.4           |
| 42:7-PS            | 1.4           | 1.4         | 2.4           | 2.7         | 0.8           | 0.8         | 1.4             | 1.3           |
| 42:6-PS            | 6.9           | 7.4         | 7.8           | 8.9         | 4.6           | 4.5         | 7.0             | 7.1           |
| 42:5-PS            | 4.6           | 5.1         | 5.4           | 6.1         | 5.8           | 5.1         | 7.4             | 7.3           |
| 42:4-PS            | 0.2           | 0.2         | 0.2           | 0.3         | 0.3           | 0.2         | 0.4             | 0.3           |
| 44:10-PS           | 3.3           | 0.3         | 0.3           | 0.3         | 0.3           | 0.3         | 0.2             | 0.3           |
| 44:9-PS            | 0.2           | 3.0         | 2.2           | 2.2         | 3.0           | 2.8         | 2.1             | 2.0           |
| 44:8-PS            | 9.0           | 8.8         | 7.9           | 7.5         | 12.8          | 11.2        | 8.6             | 7.6           |
| 44:7-PS            | 6.4           | 6.8         | 9.4           | 9.2         | 4.8           | 4.9         | 7.0             | 7.2           |
| 44:6-PS            | 1.3           | 1.3         | 2.1           | 2.1         | 0.9           | 0.9         | 1.5             | 1.6           |
| 44:5-PS            | 0.1           | 0.1         | 0.1           | 0.2         | 0.1           | 0.2         | 0.2             | 0.2           |
| 46:11-PS           | 0.4           | 0.3         | 0.4           | 0.4         | 0.3           | 0.4         | 0.3             | 0.4           |
